# Supplementary material
Source: publisher site journal article supplement (https://www.dovepress.com/article/232693)
Supplement: Supplementary file 1 [file get_supplementary_file.php]

**APPENDIX: Search strategy**

**Date:** 15, December, 2017 (An updated search was done on 10, March 2019)

**Database 1:** **Cochrane**

**Search:**

1. Cabergoline and lactation 10

**Database 2: EMBASE**

**Search:**

1. exp dopamine 2 receptor stimulating agent/ 2137
2. cabergoline.tw. 2030
3. dostinex.tw. 274
4. 1 or 2 or 3 4266
5. exp lactation/ or exp lactation inhibition/ 46472
6. (lactat* adj5 suppress*).tw. 845
7. 5 or 6 46850
8. 4 and 7 82
9. limit 8 to (human and english language) 45

**Database 3: Medline**

**Search:**

1. Dopamine Agonists/ and Receptors, Dopamine D2/ 2258
2. cabergoline.tw. 1509
3. dostinex.tw. 17
4. Lactation/ 40167
5. (lactat* adj5 suppress*).tw. 846
6. 1 or 2 or 3 3709
7. 4 or 5 40570
8. 6 and 7 44
9. limit 8 to (english language and humans) 21

**Database 4: IPA**

**Search:**

1. cabergoline.tw. 93
2. dostinex.tw. 14
3. 1 or 2 93
4. lactation.tw. 452
5. 3 and 4 6

**Database 5: SCOPUS**

**Search:**

1. TITLE-ABS-KEY( cabergoline OR dostinex ) 4678
2. TITLE-ABS-KEY ( lactat* W/5 suppress* ) 1134
3. TITLE-ABS-KEY ( lactat* W/5 inhibit* ) 4256
4. ( TITLE-ABS-KEY ( lactat* W/5 inhibit* ) ) OR ( TITLE-ABS-KEY ( lactat* W/5 suppress* ) ) 5125
5. ( ( TITLE-ABS-KEY ( lactat* W/5 inhibit* ) ) OR ( TITLE-ABS-KEY ( lactat* W/5 suppress* ) ) ) AND ( TITLE-ABS-KEY ( cabergoline OR dostinex ) ) 58
